# Supplementary material for: Poor construction, not time, takes its toll on subsidised fences designed to deter large carnivores
Source: PLoS One. 2017 Apr 10;12(4):e0175211. doi: 10.1371/journal.pone.0175211 (PMC5386237; doi:10.1371/journal.pone.0175211)
Supplement: S1 File — (XLSX) [file pone.0175211.s001.xlsx]

## Sheet: Blad1
Year when subsidy received	Field visit made by	X-coordinates	Y-coordinates	Date for visit	Fence currently in use	Sheep flock size	All criterias met	Robust corners	Robust ends	Posts at infliction points	Max 30cm above ground	Ditches OK.
2001	Per	6650460	1404288	160718	Yes	99	No	No	No	Yes	No	Yes
2001	Liz	6606497	1281489	160630	Yes	65	No	No	No	Yes	No	No
2002	Per	6685310	1346569	160913	Yes	NA	No	No	No	No	Yes	Yes
2002	Per	6568973	1304451	160616	Yes	NA	No	No	No	Yes	Yes	No
2002	Liz	6571156	1311892	160601	Yes	150	No	No	Yes	Yes	Yes	Yes
2002	Liz	6589356	1308647	160615	Yes	15	No	No	Yes	Yes	Yes	Yes
2002	Urban	6595962	460262	160602	Yes	30	No	No	No	Yes	Yes	No
2002	Liz	6626130	1379355	160527	Yes	6	No	No	Yes	Yes	Yes	Yes
2002	Urban	6619061	1402769	160628	Yes	10	No	No	Yes	Yes	Yes	Yes
2002	Liz	6586597	1324504	160817	Yes	30	No	No	Yes	Yes	No	No
2003	Liz	6584174	1303513	160601	Yes	100	No	No	No	Yes	Yes	No
2003	Urban	6662005	455786	160609	Yes	15	No	No	No	Yes	Yes	No
2003	Urban	6652259	1396842	160610	Yes	10	No	No	Yes	Yes	Yes	Yes
2004	Per	6640225	1339726	160614	Yes	20	No	No	No	iu	No	Yes
2004	Per	6585856	1405145	160617	Yes	40	No	Yes	Yes	Yes	No	Yes
2004	Urban	6647483	1411989	160616	Yes	17.5	No	No	Yes	Yes	Yes	No
2004	Per	6597470	1370427	160905	Yes	99	No	No	No	Yes	Yes	Yes
2004	Urban	6640264	1339322	161010	Yes	NA	No	No	Yes	Yes	Yes	Yes
2004	Urban	6628396	1363721	160618	Yes	45	No	Yes	Yes	Yes	Yes	No
2005	Per	6692102	1331740	160603	Yes	24	No	No	No	Yes	Yes	Yes
2005	Urban	6629534	1406443	160628	Yes	25	No	No	Yes	Yes	Yes	Yes
2005	Urban	6624443	1417857	160704	Yes	70	No	No	Yes	Yes	Yes	Yes
2005	Urban	6633249	1353288	160803	Yes	80	No	No	No	Yes	Yes	Yes
2005	Urban	6611032	1398309	160628	Yes	75	No	No	Yes	Yes	Yes	Yes
2005	Urban	6653168	1356066	160803	Yes	150	No	No	No	No	Yes	Yes
2006	Per	659459	1409914	160721	Yes	30	No	No	No	Yes	Yes	No
2006	Per	6690771	1329516	160811	Yes	30	No	Yes	No	Yes	Yes	Yes
2006	Per	6681764	1321475	160811	Yes	29	No	No	No	Yes	No	Yes
2006	Liz	6552946	1410681	160609	Yes	200	No	No	No	Yes	No	No
2006	Urban	6632425	1353397	160630	Yes	100	No	No	Yes	Yes	Yes	Yes
2006	Urban	6620380	1366698	160707	Yes	120	No	No	Yes	No	Yes	Yes
2006	Liz	6585509	1405973	160907	Yes	30	No	No	Yes	Yes	No	No
2007	Per	6689005	1346609	160913	Yes	100	No	No	No	Yes	Yes	NA
2007	Per	6689597	1347587	160809	Yes	99	No	No	No	Yes	Yes	Yes
2007	Per	6689148	1346508	160809	Yes	100	No	No	No	Yes	No	Yes
2007	Liz	6550810	1395747	160802	Yes	80	No	No	No	Yes	No	No
2007	Urban	6673680	1366238	160804	Yes	40	No	Yes	No	Yes	No	No
2007	Urban	6649105	1404103	160706	Yes	10	No	No	No	No	Yes	Yes
2007	Urban	6587541	1412958	161011	Yes	NA	No	No	Yes	Yes	Yes	Yes
2007	Liz	6619061	1291568	160901	Yes	15	No	No	No	Yes	No	No
2007	Urban	6629614	1360777	160804	Yes	80	No	No	No	Yes	Yes	Yes
2007	Per	6602859	1386151	160907	Yes	27	No	No	No	Yes	No	No
2008	Per	6685900	1353125	160601	Yes	99	No	No	Yes	Yes	Yes	Yes
2008	Per	6652462	1404716	160718	Yes	99	No	No	No	Yes	No	Yes
2008	Per	6678472	1325554	160811	Yes	30	Yes	Yes	Yes	Yes	Yes	Yes
2008	Per	6611258	1378396	160907	Yes	99	No	No	No	Yes	Yes	No
2008	Per	6603187	1386429	160906	Yes	15	No	No	No	Yes	No	No
2008	Urban	6646814	1406007	160802	Yes	8.5	No	No	No	Yes	Yes	Yes
2008	Liz	6597018	1292018	160526	Yes	86	No	Yes	Yes	Yes	No	No
2008	Per	6701528	1349753	160602	Yes	10	No	No	No	Yes	Yes	Yes
2010	Per	6680093	1322598	160610	Yes	40	Yes	Yes	Yes	Yes	Yes	Yes
2010	Per	6585946	1405467	160617	Yes	40	Yes	Yes	Yes	Yes	Yes	Yes
2010	Per	6705865	1345940	160602	Yes	NA	No	No	No	Yes	Yes	No
2010	Urban	6628960	1357510	160809	Yes	NA	Yes	Yes	Yes	Yes	Yes	Yes
2010	Liz	6617112	1323822	160901	Yes	10	No	No	No	Yes	No	No
2010	Liz	6605769	1239029	160628	Yes	8	No	No	Yes	-	-	Yes
2010	Liz	6562429	1403542	160802	Yes	7.5	No	No	Yes	Yes	Yes	No
2011	Per	6691941	1328692	160603	Yes	NA	No	No	No	Yes	Yes	Yes
2011	Per	6691435	1322672	160607	Yes	19	Yes	Yes	Yes	Yes	Yes	Yes
2011	Urban	6647071	1357821	160808	Yes	15	No	No	No	Yes	Yes	No
2011	Urban	6639476	1347863	160808	Yes	40	No	No	No	No	Yes	Yes
2011	Urban	6628459	1393612	160824	Yes	25	No	No	iu	Yes	Yes	Yes
2011	Liz	6556099	1399106	160908	Yes	150	No	No	Yes	Yes	No	No
2011	Liz	6557514	1412274	160809	Yes	4	No	No	No	No	Yes	Yes
2011	Liz	6591120	1402563	160804	Yes	11	No	No	Yes	Yes	No	No
2011	Liz	6553248	1410954	160609	Yes	200	No	No	No	Yes	No	Yes
2012	Per	6680078	1322466	160610	Yes	40	No	Yes	No	Yes	Yes	Yes
2012	Urban	6653615	1367197	160810	Yes	NA	No	No	No	Yes	Yes	No
2012	Urban	6608805	1355954	160701	Yes	100	No	No	Yes	No	Yes	No
2012	Urban	6637585	1385414	160802	Yes	10	No	Yes	No	Yes	Yes	No
2012	Urban	6651173	1355783	160809	Yes	12	No	No	No	Yes	Yes	Yes
2012	Liz	6604528	1293988	160628	Yes	75	No	No	No	NA	NA	Yes
2012	Liz	6605750	1292816	160628	Yes	8	Yes	Yes	Yes	Yes	Yes	Yes
2012	Liz	6597322	1353129	160818	Yes	20	No	Yes	No	No	No	No
2013	Per	6731670	1344252	160722	Yes	20	Yes	Yes	Yes	Yes	Yes	Yes
2013	Liz	6552587	1396101	160802	Yes	80	No	No	Yes	Yes	Yes	No
2013	Liz	6587054	1347473	160802	Yes	130	No	Yes	Yes	Yes	Yes	No
2013	Liz	6548777	1407474	160609	Yes	30	No	No	Yes	Yes	No	No
2013	Urban	6652091	1360946	161010	Yes	NA	No	No	Yes	Yes	Yes	Yes
2013	Urban	6632945	1348518	161010	Yes	NA	No	No	Yes	Yes	Yes	Yes
2013	Urban	6609302	1373846	161011	Yes	NA	No	No	Yes	Yes	Yes	Yes
2013	Urban	6602652	1366507	161011	Yes	NA	Yes	Yes	Yes	Yes	Yes	Yes
2013	Liz	6562484	1333149	160817	Yes	20	No	No	No	Yes	No	No
2014	Per	6642593	1300860	160720	Yes	6	No	No	Yes	Yes	Yes	Yes
2014	Per	6693504	1331752	160603	Yes	10	Yes	Yes	Yes	Yes	Yes	Yes
2014	Urban	6634123	1404082	160826	Yes	NA	No	No	iu	Yes	Yes	Yes
2014	Urban	6628791	1346004	160812	Yes	30	Yes	Yes	Yes	Yes	Yes	Yes
2014	Urban	6618572	1350507	160812	Yes	9	Yes	Yes	Yes	Yes	Yes	Yes
2014	Liz	6590222	1397454	160811	Yes	8	No	No	Yes	Yes	No	No
2014	Liz	6597642	1386932	160811	Yes	50	No	Yes	Yes	Yes	Yes	No
2014	Liz	6565820	1402984	160809	Yes	75	Yes	Yes	Yes	Yes	Yes	Yes
2014	Liz	662175	1343501	161011	Yes	55	Yes	Yes	Yes	Yes	Yes	Yes
2015	Per	6699469	1330526	160607	Yes	10	No	No	No	Yes	Yes	Yes
2015	Per	6675026	1332194	160607	Yes	NA	No	Yes	No	Yes	Yes	No
2015	Liz	6587581	1349420	160524	Yes	8	Yes	Yes	Yes	Yes	Yes	Yes
2015	Liz	6587482	1346809	160614	Yes	135	No	Yes	Yes	Yes	No	No
2015	Liz	6605538	1369099	160608	Yes	12	No	No	No	Yes	Yes	Yes
2015	Liz	6550142	1410637	160809	Yes	8	No	Yes	Yes	Yes	Yes	No
2015	Urban	6606390	1408470	160824	Yes	20	No	Yes	Yes	Yes	No	Yes
2015	Liz	6583036	1303161	160615	Yes	30	No	No	No	Yes	Yes	Yes
